# Supplementary material for: Versatile enantiocontrolled synthesis of (+)-fostriecinElectronic supplementary information (ESI) available: experimental section. See http://www.rsc.org/suppdata/cc/b2/b209742g/
Source: Royal Society of Chemistry journal article supplement (doi:10.1039/b209742g), 2002-11-15
Supplement: b209742g.doc [file b209742g.doc]

# Versatile Enantiocontrolled Synthesis of (+)-Fostriecin

Tomoyuki Esumi, Nanako Okamoto, and Susumi Hatakeyama*

#### Graduate School of Biomedical Sciences, Nagasaki University, Nagasaki 852-8521, Japan susumi@net.nagasaki-u.ac.jp

## Supporting Information

**General Procedure.** Where appropriate, reactions were performed in flame-dried glassware under an argon atmosphere. All extracts were dried over MgSO4 and concentrated by rotary evaporation below 30 °C at ca. 25 Torr. Analytical and preparative thin-layer chromatography were performed with Merck F-254 TLC plates. Column chromatography was performed employing silica gel 60 (230-400 mesh ASTM, Merk).

**Materials.** Commercial reagents and solvents were used as supplied with the following exceptions. Anhydrous tetrahydrofuran (THF) (stabilizer free) was purchased from Kanto Chemical Co., Inc. Diethyl ether (Et2O) were distilled from sodium benzophenone ketyl. Dichloromethane (CH2Cl2), triethylamine (Et3N), dimethyl sulfoxide (DMSO), and *N*,*N*-dimethyformamide (DMF) were distilled from calcium hydride. Benzene, toluene, and acetonitrile (MeCN) were distilled from P2O5. Acryloyl chloride was distilled from pyridine.

**Instrumentation.** Infrared spectra were measured on a JASCO FT/IR-230 spectrometer. Optical rotations were recorded on a JASCO DIP-370 polarimeter at ambient temperature. 1H and 13C NMR spectra were measured on a Varian Gemini 300 or a Varian Unity plus 500 spectrometer. Chemical shifts are reported in parts per million (ppm) downfield from tetramethylsilane (TMS) in  units and coupling constants are given in hertz. TMS was defined as 0 ppm for 1H NMR spectra and the center line of the triplet of CDCl3 was also defined as 77.10 ppm for 13C NMR spectra. EI and FAB Mass spectra were measured on a JEOL JMS-DX303.

**(*E*)-2-Tributylstannanyl-5-(4-methoxybenzyloxy)pent-2-ene (8)**

To a solution of (*E*)-4-(tributylstannanyl)pent-3-en-1-ol (**7**) 1 (10.9 g, 29.1 mmol) in DMSO (100 ml) was added NaH (60% in oil; 1.75 g, 43.8 mmol) at 0 °C. After stirring at room temperature for 1.5 h, tetrabutylammonium iodide (328.7 mg, 0.890 mmol) and *p*-methoxybenzyl chloride (5.5 ml, 40.6 mmol) were added and the mixture was stirred overnight. The reaction mixture was diluted with ice-water (200 ml) and extracted with Et2O. The extract was washed with saturated NaCl, dried, and concentrated. Purification of the residue by silica gel column chromatography (SiO2 pretreated with 8% Et3N-hexane 100 g, 4% Et3N-hexane) gave **8** (12.96 g, 90%) as a pale yellow oil. 1H NMR (300 MHz, CDCl3)  7.27 (2H, d, *J* = 8.4 Hz), 6.88 (2H, d, *J* = 8.4 Hz), 5.53 (1H, qt, *J* = 0.9, 6.6 Hz, *J*119Sn-H~*J*117Sn-H = 69.6 Hz), 4.46 (2H, s), 3.80 (3H, s), 3.47 (2H, t, *J* = 6.6 Hz), 2.45 (2H, q, *J* = 6.6 Hz), 1.84 (3H, d, *J* = 0.9 Hz, *J*119Sn-H~*J*117Sn-H = 49.2 Hz), 1.48 (6H, m), 1.29 (6H, m), 0.89 (15H, m); 13C NMR (75 MHz, CDCl3)  159.2, 140.4, 136.4 (*J*119Sn-C~*J*117Sn-C = 29.6 Hz), 129.3, 113.8, 29.2 (*J*119Sn-C~*J*117Sn-C = 19.3 Hz), 28.9, 27.5 (*J*119Sn-C~*J*117Sn-C = 54.7 Hz), 19.3 (*J*119Sn-C~*J*117Sn-C = 42.8 Hz), 13.8, 9.16 (*J*119Sn-C = 342.8 Hz, *J*117Sn-C = 311.9 Hz); IR (neat) 1514, 1456, 1247, 1097, 1039 cm-1; MS (FAB, NBA) 439 (M–Bu+) for major 120Sn isotope.

**(*E*)-2-Iodo-5-(4-methoxybenzyloxy)pent-2-ene (9)**

To an ice-cooled solution of **8** (17.5 g, 35.6 mmol) in CH2Cl2 (170 ml) was added iodine (9.52 g, 37.5 mmol). After stirring at 0 °C for 10 min, the reaction was quenched with saturated NaHCO3 (50 ml) and 10% Na2S2O3 (50 ml). The reacrtion mixture was extracted with Et2O, dried, and concentrated. Purification of the residue by silica gel column chromatography (SiO2 pre-treated with 8% Et3N-hexane 100 g, 4% Et3N-hexane) gave **9** (11.82 g, 100%) as a pale yellow oil.1H NMR (300 MHz, CDCl3)  7.25 (2H, d, *J* = 8.7 Hz), 6.87 (2H, d, *J* = 8.7 Hz), 6.18 (1H, tq, *J* = 7.4, 0.6 Hz), 4.43 (2H, s), 3.80 (3H, s), 3.43 (2H, t, *J* = 6.6 Hz), 2.37 (3H, d, *J* = 0.6 Hz), 2.32 (2H, dt, *J* = 7.4, 6.6 Hz); 13C NMR (75 MHz, CDCl3) 159.3, 137.5, 130.4, 129.3, 113.9, 95.4, 72.7, 68.4, 55.4, 34.3, 27.7; IR (neat) 1610, 1510, 1450, 1360, 1242, 1085 cm-1; HRMS (EI) calcd for C13H17IO2 (M–I+): 205.1224, found: 205.1242.

**(2*E*,4*E*)-7-(4-Methoxybenzyloxy)-4-methylhept-2,4-dien-1-al (10)**

A solution of **9** (590 mg, 1.777 mmol), acrolein (0.24 l, 3.560 mmol), tetrabutylammonium chloride (505 mg, 1.820 mmol), K2CO3 (620 mg, 4.492 mmol), and Pd(OAc)2 (7.0 mg, 0.0350 mmol) in DMF (20 ml) was stirred at room temperature for 4 h. The reaction mixture was diluted with Et2O, washed with water and saturated NaCl, dried, and concentrated. Purification of the residue by silica gel column chromatography (SiO2 20 g, 17% AcOEt-hexane) gave **10** (337 mg, 73%) as a colorless oil. 1H NMR (300 MHz, CDCl3)  9.54 (1H, d, *J* = 7.8 Hz), 7.25 (2H, d, *J* = 8.7 Hz), 7.10 (1H, d, *J* = 15.6 Hz), 6.87 (2H, d, *J* = 8.7 Hz), 6.09 (1H, dd, *J* = 7.8, 15.6 Hz), 6.05 (1H, t, *J* = 6.6 Hz), 4.45 (2H, s), 3.77 (3H, s), 3.54 (2H, t, *J* = 6.6 Hz), 2.53 (2H, q, *J* = 6.6 Hz), 1.80 (3H, s); 13C NMR (75 MHz, CDCl3)  193.9, 159.0, 157.3, 140.5, 134.6, 130.1, 129.1, 126.8, 113.6, 72.5, 68.3, 55.0, 29.6, 12.2; IR (neat) 1678, 1618, 1512, 1248, 1132, 1097 cm-1; HRMS (EI) calcd for C16H20O3 (M+): 260.1412, found: 260.1424.

**(4*R*,5*E*,7*E*)-10-(4-Methoxybenzyloxy)-7-methyldec-1,5,7-trien-4-ol (11)**

To a stirred solution of (+)-*B*-methoxydiisopinocampheylborane (6.80 g, 21.6 mmol) in Et2O (25 ml) was added allylmagnesium bromide (1.0 M in Et2O; 22 ml, 22 mmol) at -78 ˚C. After 15 min, the mixture was allowed to warm to room temperature and stirred for 11 h. The resulting solution was added to a mixture of **10** (3.47 g, 13.7 mmol) and 4A molecular sieves (2.00 g) in toluene (40 ml) via cannula at –78 °C. After stirring for 6 h at –78 °C, 3 M NaOH (40 ml) and THF (40 ml) were added and the mixture was allowed to warm to 0 °C and then treated with 30% H2O2 (20 ml). After being stirred at room temperature overnight, the reaction mixture was diluted with 3 M NaOH (100 ml), extracted with Et2O, washed water and saturated NaCl, dried, and concentrated. Purification of the residue by silica gel column chromatography (SiO2 200 g, 20% AcOEt-hexane) gave **11** (3.26 g, 81%) as a pale yellow oil. []23D +5.3 (*c* 1.05, CHCl3); 1H NMR (300 MHz, CDCl3)  7.26 (2H, d, *J* = 8.4 Hz), 6.88 (2H, d, *J* = 8.4 Hz), 6.25 (1H, d, *J* = 15.9 Hz), 5.82 (1H, m), 5.60 (1H, dd, *J* = 6.6, 15.6 Hz), 5.50 (1H, t, *J* = 7.2 Hz), 5.16 (1H, brd, *J* = 7.5 Hz), 5.12 (1H, s), 4.45 (2H, s), 4.22 (1H, q, *J* = 6.6 Hz), 3.80 (3H, s), 3.47 (2H, t, *J* = 6.9 Hz), 2.45 (2H, q, *J* = 6.9 Hz), 2.33 (2H, m), 1.75 (3H, s); 13C NMR (75 MHz, CDCl3)  159.2, 135.5, 134.6, 134.4, 130.6, 129.3, 129.1, 128.9, 118.2, 113.8, 72.7, 72.0, 69.3, 55.3, 42.2, 29.1, 12.6; IR (neat) 3404, 1612, 1512, 1244, 1088, 1033 cm-1; HRMS (EI) calcd for C19H26O3 (M+):302.1882, found: 302.1873.

**(1*R*,2*E*,4*E*)-1-Allyl-7-(4-methoxybenzyloxy)-4-methylhept-2,4-dienyl Acrylate (12)**

To an ice-cooled solution of **11** (2.28 g, 7.54 mmol) and Et3N (1.27 l, 9.05 mmol) in CH2Cl2 (22 ml) was added acryloyl chloride (688 l, 8.67 mmol). After stirring at 0 °C for 40 min, the reaction mixture was poured into saturated NaHCO3 (350 ml), extracted with CH2Cl2, dried, and concentrated. Purification of the residue by silica gel column chromatography (SiO2 60 g, 9% AcOEt-hexane) gave **12** (2.14 g, 80%) as a colorless oil.[]21D +2.9 (*c* 1.03, CHCl3); 1H NMR (300 MHz, CDCl3)  7.26 (2H, d, *J* = 8.4 Hz), 6.88 (2H, d, *J* = 8.4 Hz), 6.40 (1H, dd, *J* = 1.5, 17.4 Hz), 6.30 (1H, d, *J* = 15.6 Hz), 6.11 (1H, dd, *J* = 10.5, 17.4 Hz), 5.81 (1H, dd, *J* = 1.5, 10.5 Hz), 5.74 (1H, m), 5.53 (1H, dd, *J* = 6.9, 15.6 Hz), 5.53 (1H, t, *J* = 6.9 Hz), 5.43 (1H, q, *J* = 6.9 Hz), 5.10 (1H, brd, *J* = 15.9 Hz), 5.07 (1H, brd, *J* = 9.6 Hz), 4.44 (2H, s), 3.80 (3H, s), 3.46 (2H, t, *J* = 6.9 Hz), 2.44 (4H, q, *J* = 6.9 Hz), 1.73 (3H, s); 13C NMR (75 MHz, CDCl3)  165.5, 159.2, 137.7, 134.4, 133.4, 130.7, 130.5, 129.4, 128.9, 124.2, 118.0, 113.8, 74.3, 72.7, 69.3, 55.3, 39.3, 29.1, 12.5; IR (neat) 1722, 1512, 1250, 1190, 1095, 1037, 966, 815 cm-1; MS (FAB, NBA) *m/z* 379 (M+Na+).

**(6*R*)-6-[(1*E*,3*E*)-16-(4-Methoxybenzyloxy)-3-methylhexa-1,3-dienyl]-5,6-dihydropyran-2-one (13)**

To a degassed solution of **12** (444.3 mg, 1.25 mmol) in CH2Cl2 (125 ml) was added (Cy3P)2Cl2Ru=CHPh (103.0 mg, 0.125 mmol). After being refluxed for 20 h, the reaction mixture was concentrated and chromatographed (SiO2 = 25 g, 25% AcOEt-hexane) to give **13** (306.4 mg, 75%) as a pale yellow oil. The optical purity was determined to be 77% ee by HPLC (CHIRALCELL OD, DAICEL Chemical Industries LTD., 20% *i*-PrOH-hexane). []22D +22.8 (*c* 1.09, CHCl3); 1H NMR (300 MHz, CDCl3)  7.25 (2H, d, *J* = 8.4 Hz), 6.89 (1H, m), 6.87 (2H, d, *J* = 8.4 Hz), 6.34 (1H, d, *J* = 15.9 Hz), 6.04 (1H, dt, *J* = 1.8, 9.6 Hz), 5.64 (1H, dd, *J* = 6.9, 15.9 Hz), 5.57 (1H, t, *J* = 7.5 Hz), 4.96 (1H, q, *J* = 6.9 Hz), 4.44 (2H, s), 3.79 (3H, s), 3.47 (2H, t, *J* = 6.9 Hz), 2.44 (4H, m), 1.74 (3H, s); 13C NMR (75 MHz, CDCl3)  164.1, 159.2, 144.8, 138.2, 134.1, 131.2, 130.5, 129.3, 123.0, 121.7, 113.8, 78.5, 72.7, 69.2, 55.3, 30.0, 29.1, 12.5; IR (neat) 1714, 1512, 1381, 1240 cm-1; MS (FAB, NBA) *m/z* 351 (M+Na+).

**(6*R*)-6-[(3*R*,4*R*,1*E*)-6-(4-Methoxybenzyloxy)-3-methyl-3,4-dihydroxyhexen-1-yl]-5,6-dihydropyran-2-one (14)**

To an ice cooled solution of **13** (1.09 g, 3.34 mmol) and MeSO2NH2 (320.7 mg, 3.37 mmol) in *t*-BuOH-H2O (1:1, 40 ml) was added AD-mix- (6.68 g). After being stirred at 0 °C for 6 h, the reaction mixture was diluted with saturated NaCl (10 ml), extracted with AcOEt, washed with saturated Na2S2O3 (15 ml), dried, and concentrated. Purification of the residue by silica gel column chromatography (SiO2 50 g, Et2O) gave **14** as a pale yellow oil. This compound was shown to be enantiomerically pure by 1H NMR (500 MHz) analysis of the corresponding (*R*)- and (*S*)-MTPA esters. []20D +34.7 (*c* 0.99, CHCl3); 1H NMR (300 MHz, CDCl3)  7.23 (2H, d, *J* = 8.7 Hz), 6.87 (2H, d, *J* = 8.7 Hz), 6.86 (1H, m), 6.02 (1H, dt, *J* = 9.9, 1.2 Hz), 5.95 (1H, d, *J* = 15.6 Hz), 5.87 (1H, dd, *J* = 5.1, 15.6 Hz), 4.93 (1H, dt, *J* = 9.9, 5.1 Hz), 4.44 (2H, s), 3.79 (3H, s), 3.67 (3H, m), 3.48 (1H, brs), 2.78 (1H, brs), 2.43 (2H, m), 1.75 (2H, m), 1.23 (3H, s); 13C NMR (75 MHz, CDCl3)  164.1, 159.4, 144.9, 138.5, 129.7, 129.5, 126.1, 121.5, 113.9, 76.9, 74.3, 73.1, 69.0, 55.3, 30.5, 29.9, 22.8; IR (neat) 3496, 1707, 1248 cm-1; MS (FAB, NBA) *m/z* 363 (M+H+).

**(6*R*)-6-[(3*R*,4*R*,1*E*)-6-(4-Methoxybenzyloxy)-3-methyl-3,4-di(triethylsilanyloxy)hexen-1-yl]-5,6-dihydropyran-2-one (15)**

To a solution of **14** (851 mg, 2.35 mmol) and 2,6-litidine (820 l, 7.04 mmol) in CH2Cl2 (17 ml) was added TESOTf (1.3 ml, 5.75 mmol) at –78 °C. After stirring at –78 °C for 30 min, the reaction was quenched with saturated NaHCO3 (100 ml). The reaction mixture was extracted with CH2Cl2, dried, and concentrated. Purification of the residue by silica gel column chromatography (SiO2 30 g, 17% AcOEt-hexane) gave **15** (1.26 g, 91%) as a colorless oil.[]18D +36.5 (*c* 1.04, CHCl3); 1H NMR (300 MHz, CDCl3)  7.25 (2H, d, *J* = 8.4 Hz), 6.87 (2H, d, *J* = 8.4 Hz), 6.86 (1H, m), 6.04 (1H, dt, J = 9.6, 1.7 Hz), 5.92 (1H, d, *J* = 15.9 Hz), 5.76 (1H, dd, J = 6.6, 15.9 Hz), 4.92 (1H, q, *J* = 7.2 Hz), 4.40 (2H, s), 3.80 (3H, s), 3.58 (1H, dd, J = 3.6, 7.8 Hz ), 3.45 (2H, dd, J = 6.3, 7.8 Hz), 2.40 (2H, m), 1.94 (1H, ddt, J = 3.6, , 14.1, 7.8 Hz), 1.41 (1H, ddt, J = 7.8, 14.1 Hz), 6.3, 1.33 (3H, s), 0.942 (9H, t, J = 7.8 Hz), 0.937 (9H, t, J = 7.8 Hz), 0.59 (6H, q, J = 7.8 Hz), 0.58 (6H, q, J = 7.8 Hz); 13C NMR (75 MHz, CDCl3)  164.3, 159.1, 144.8, 138.3, 129.3, 125.6, 121.7, 113.7, 78.1, 77.8, 76.9, 72.5, 67.5, 55.3, 33.4, 29.9, 25.6, 7.2, 7.1, 6.9, 5.4; IR (neat) 1730 , 1514, 1246, 1105, 1007, cm-1; MS (FAB, NBA) *m/z* 363 (M+H+).

**(6*R*)-6-[(3*R*,4*R*,1*E*)-6-Hydroxy-3-methyl-3,4-di(triethylsilanyloxy)hexen-1-yl]-5,6-dihydropyran-2-one (16)**

To an ice-cooled solution of **15** (356.1 mg, 0.603 mmol) in CH2Cl2-H2O (20 : 1, 27 ml) was added 2,3-dichloro-5,6-dicyanobenzoquinone (343.9 mg, 0.731 mmol). After being stirred for 1 hr, the reaction mixture was diluted with saturated NaHCO3 (50 ml), extracted with CH2Cl2, washed with water and saturated NaCl, dried, and concentrated. Purification of the residue by silica gel column chromatography (SiO2 10 g, 20% AcOEt-hexane to 33% AcOEt-hexane) gave **16** (282.4 mg, 99%) as a colorless oil.[]23D +42.8 (*c* 1.01, CHCl3); 1H NMR (300 MHz, CDCl3)  6.88 (1H, dt, *J* = 3.9, 9.6 Hz), 6.05 (1H, dt, *J* = 1.5, 9.9 Hz), 5.93 (1H, dd, *J* = 0.9, 15.9 Hz), 5.77 (1H, dd, *J* = 6.3, 15.9 Hz), 4.96 (1H, q, *J* = 6.3 Hz), 3.671 (2H, brquint., *J* = 5.1 Hz), 2.45 (2H, m), 1.95 (1H, brt, *J* = 5.1 Hz), 1.86 (1H, m), 1.58 (3H, d, *J* = 2.4 Hz), 1.53 (1H, m), 0.97 (9H, t, *J* = 8.1 Hz), 0.96 (9H, t, *J* = 8.1 Hz), 0.63 (6H, q, *J* = 8.1 Hz), 0.62 (6H, q, *J* = 8.1 Hz); 13C NMR (75 MHz, CDCl3)  164.1, 144.7, 138.0, 125.8, 121.59, 78.0, 77.9, 77.7, 60.2, 36.4, 29.8, 25.4, 7.1, 7.0, 6.8, 5.2; IR (neat) 3448, 1724, 1459, 1381, 1244, 1105, 1012 cm-1; MS (FAB, NBA) *m/z* 493 (M+Na +).

**(3*R*,4*R*,5*E*)-4-Methyl-6-[(2*R*)-6-oxo-3,6-dihydro-2*H*-pyran-2-yl]-3,4-di(triethylsilanyloxy)-hex-5-enal (17)**

To an ice-cooled solution of **16** (997 mg, 2.121 mmol) in CH2Cl2 (20 ml) Dess-Martin periodinane (2.700 g, 6.378 mmol). After stirring at 0 °C for 1 h, the reaction was quenched with saturated NaHCO3 (50 ml) and 10% Na2S2O3 (50 ml). The reaction mixture was extracted with AcOEt, washed with saturated NaHCO3 and saturated NaCl, dried, and concentrated. Purification of the residue by silica gel column chromatography (SiO2 10 g, 33% AcOEt-hexane) gave **17** (996 mg, 100%) as a colorless oil.[]24D +42.5 (*c* 1.00, CHCl3); 1H NMR (300 MHz, CDCl3)  9.70 (1H, t, *J* = 2.1 Hz), 6.89 (1H, ddd, *J* = 4.5, 5.1, 9.6 Hz), 6.05 (1H, dt, *J* = 2.1, 9.9 Hz), 5.93 (1H, d, *J* = 15.6 Hz), 5.78 (1H, dd, *J* = 6.3, 15.6 Hz), 4.97 (1H, dt, *J* = 6.3, 8.7 Hz), 4.03 (1H, dd, *J* = 5.1, 6.0 Hz), 2.62 (1H, ddd, *J* = 2.1, 6.0, 16.5 Hz), 2.45 (2H, m), 2.36 (1H, ddd, *J* = 2.1, 5.1, 16.5 Hz), 1.40 (3H, s), 0.95 (9H, t, *J* = 7.8 Hz), 0.94 (9H, t, *J* = 7.8 Hz), 0.62 (6H, q, *J* = 7.8 Hz), 0.59 (6H, q, *J*= 7.8 Hz); 13C NMR (75 MHz, CDCl3)  200.5, 164.1, 144.7, 137.0, 128.3, 126.8, 121.1, 77.6, 75.2, 47.9, 29.8, 25.6, 6.9, 4.99; IR (neat) 1728, 1240, 1107, 1011 cm-1; MS (FAB, NBA) *m/z* 491 (M+Na+).

**A mixture of (6*R*)-[(6*R*,3*R*,4*R*,1*E*)-6-Hydroxy-3-methyl-3,4-di(triethylsilanyloxy)oct-1-en-7-ynyl]-5,6-dihydropyran-2-one and (6*R*)-[(6*S*,3*R*,4*R*,1*E*)-6-Hydroxy-3-methyl-3,4-di(triethylsilanyloxy)oct-1-en-7-ynyl]-5,6-dihydropyran-2-one (18)**

To a solution of anhydrous CeCl3 (609.1 mg, 2.47 mmol) in THF ethynylmagnesium bromide (0.5 M in THF, 4.9 ml, 2.45 mmol) was added over 5 min at –78 °C. After 1 hr, a solution of **17** (365.5 mg, 0.781 mmol) in THF (5 ml) was added to the mixture over 7 min at –78 °C. After 10 min, the reaction mixture was allowed to warm to –50 °C, and stirred for 50 min. The reaction was quenched with water (15 ml) and the reaction mixture was filtered through Celite. The filtrate was extracted with Et2O, washed with water, dried, and concentrated. Purification of the residue by silica gel column chromatography (SiO2 15 g, 20% AcOEt-hexane to 33% AcOEt-hexane) gave a epimeric mixture of the acetylene-adducts [378.7 mg, 98% (11*R*:11*S* = 1:1.8)] as a colorless oil. The following data were collected after separation of the epimers by flash silica gel column chromatography.

**(*R*)-isomer**; []24D +46.0 (*c* 1.03, CHCl3); 1H NMR (300 MHz, CDCl3)  6.89 (1H, ddd, *J* = 4.2, 5.1, 9.9 Hz), 6.05 (1H, dt, *J* = 9.9, 1.5 Hz), 5.93 (1H, dd, *J* = 0.6, 15.6 Hz), 5.78 (1H, dd, *J* = 6.3, 15.6 Hz), 4.97 (1H, ddt, *J* = 0.6, 6.0, 8.1 Hz), 4.48 (1H, brd, *J* = 9.6 Hz), 3.75 (1H, dd, *J* = 4.8, 6.9 Hz), 2.46 (2H, m), 2.40 (1H, brs), 2.02 (1H, ddd, *J* = 4.8, 9.6, 14.1 Hz), 1.62 (1H, ddd, *J* = 3.6, 6.9, 14.1 Hz), 1.38 (3H, s), 1.25 (1H, s), 0.97 (9H, t, *J* = 8.1 Hz), 0.96 (9H, t, *J* = 8.1 Hz), 0.65 (6H, q, *J* = 8.1 Hz), 0.63 (6H, q, *J* = 8.1 Hz); 13C NMR (75 MHz, CDCl3)  164.2, 144.7, 137.7, 126.3, 121.8, 85.4, 77.9, 72.6, 59.6, 41.7, 29.9, 25.5, 7.2, 7.1, 6.9, 5.4; IR (neat) 3440, 3309, 1722, 1382, 1242, 1103, 1009 cm-1; MS (FAB, NBA) *m/z* 517 (M+Na+).

**(*S*)-isomer**; []17D +25.8 (*c* 1.00, CHCl3); 1H NMR (300 MHz, CDCl3)  6.88 (1H, dt, *J* = 3.6, 9.9 Hz), 6.05 (1H, dt, *J* = 9.9, 1.5 Hz), 5.94 (1H, dd, *J* = 0.6, 15.9 Hz), 5.77 (1H, dd, *J* = 6.3, 15.9 Hz), 4.96 (1H, ddt, *J* = 0.6, 7.8, 6.3 Hz), 4.45 (1H, brq, *J* = 4.2 Hz), 3.79 (1H, dd, *J* = 5.1, 6.3 Hz), 2.46 (3H, m), 2.02 (1H, ddd, *J* = 5.1, 6.9, 14.1 Hz), 1.70 (1H, dt, *J* = 14.1, 6.3 Hz), 1.40 (3H, s), 1.25 (1H, s), 0.97 (18H, t, *J* = 8.1 Hz), 0.65 (12H, q, *J* = 8.1 Hz); 13C NMR (75 MHz, CDCl3)  164.1, 144.7, 137.6, 126.3, 121.7, 84.9, 78.1, 77.8, 76.8, 73.5, 60.3, 41.6, 30.0, 25.5, 7.2, 7.1, 6.9, 5.4; IR (neat) 3429, 3309, 1724, 1382, 1242, 1105 cm-1; MS (FAB, NBA) *m/z* 517 (M+Na+).

**(6*R*)-6-[(3*R,*1*E*)-3-Methyl-6-oxo-3,4-di(triethylsilanyloxy)oct-1-en-7-ynyl]-5,6-dihydropyran-2-one (19)**

To an ice-cooled solution of **18** (887 mg, 1.795 mmol) in CH2Cl2 (40 ml) was added Dess-Martin periodinane (3.775 g, 8.900 mmol). After stirring at 0 °C for 4 h, the reaction was quenched with saturated NaHCO3 (120 ml) and 10% Na2S2O3 (60 ml). The reaction mixture was extracted with AcOEt, washed with saturated NaHCO3 and saturated NaCl, dried, and concentrated. Purification of the residue by silica gel column chromatography (SiO2 20 g, 20% AcOEt-hexane) gave **19** (841 mg, 95%) as a colorless oil.[]24D +56.2 (*c* 1.05, CHCl3); 1H NMR (300 MHz, CDCl3)  6.88 (1H, ddd, *J* = 3.6, 4.8, 9.6 Hz), 6.03 (1H, ddd, *J* = 1.5, 2.1, 9.6 Hz), 5.88 (1H, d, *J* = 15.6 Hz), 5.78 (1H, dd, *J* = 5.7, 15.6 Hz), 4.96 (1H, dt, *J* = 5.7, 9.3 Hz), 4.17 (1H, dd, *J* = 4.8, 6.6 Hz), 3.22 (1H, s), 2.89 (1H, dd, *J* = 4.8, 16.5 Hz), 2.45 (2H, m), 2.40 (1H, dd, *J* = 6.6, 16.5 Hz), 1.38 (3H, s), 0.92 (9H, t, *J* = 8.1 Hz), 0.93 (9H, t, *J* = 8.1 Hz), 0.59 (12 H, q, *J* =8.1 Hz); 13C NMR (75 MHz, CDCl3)  185.3, 164.2, 144.7, 136.9, 126.6, 121.7, 81.9, 78.6, 77.6, 77.3, 75.2, 50.0, 29.9, 25.6, 7.2, 7.0, 6.8, 5.1; IR (neat) 1730, 1682, 1460, 1383, 1244, 1111, 1007 cm-1; HRMS (EI) calcd for C26H44O5Si2 (M+):492.2727, found: 492.2776.

**(6*R*)-6-[(3*R*,4*R*,1*E*,7*Z*)-8-Iodo-3-methyl-6-oxo-3,4-di(triethylsilanyloxy)octa-1,7-dienyl]-5,6-dihydropyran-2-one (20)**

To a solution of **19** (189.5 mg, 0.385 mmol) and acetic acid (23.1 l, 0.400 mmol) in acetone (0.4 ml) was added NaI (115.4 mg, 0.770 mmol) at room temperature and the mixture was stirred for 3 days. The reaction mixture was basified with saturated NaHCO3 (10 ml), extracted with AcOEt, dried, and concentrated. Purification of the residue by flash silica gel column chromatography (SiO2 20 g, benzene) gave **20** (150.1 mg, 63%) and (*E*)-isomer **21** (14.9 mg, 6%) each as a yellow oil. **20**: []23D +54.6 (*c* 0.97, CHCl3); 1H NMR (300 MHz, CDCl3)  7.25 (1H, d, J = 8.7 Hz), 7.17 (1H, d, J =8.7 Hz), 6.89 (1H, ddd, *J* = 3.6, 5.1, 9.6 Hz), 6.05 (1H, dt, *J* = 9.6, 1.8 Hz), 5.93 (1H, dd, J = 0.6, 15.9 Hz), 5.79 (1H, dd, J = 5.7, 15.9 Hz), 4.97 (1H, dt, *J* = 5.7, 8.7 Hz), 4.18 (1H, dd, *J* = 3.6, 6.9 Hz), 2.86 (1H, dd, *J* = 3.6, 17.4 Hz), 2.46 (2H, m), 2.38 (1H, dd, *J* = 6.9, 17.4 Hz), 1.38 (3H, s), 0.91 (18H, t, *J* = 7.8 Hz), 0.59 (6H, q, *J* =7.8 Hz), 0.57 (6H, q, J = 7.8 Hz); 13C NMR (75 MHz, CDCl3)  197.1, 164.2, 144.7, 137.4, 126.0, 121.7, 90.5, 77.6, 77.3, 75.0, 48.5, 29.8. 25.6, 7.2, 7.1, 6.8, 5.1; IR (neat) 1726, 1240, 1091, 1008 cm-1; MS (FAB, NBA) *m/z* 643 (M+Na+).

**(6*R*)-6-[(3*R*,4*R*,1*E*,7*E*)-8-Iodo-3-methyl-6-oxo-3,4-di(triethylsilanyloxy)octa-1,7-dienyl]-5,6-dihydropyran-2-one (21)**

To a solution of **19** (157.9 mg, 0.321 mmol) in acetic acid (0.4 ml) was added NaI (196.1 mg, 1.31 mmol) at room temperature. After being stirred for 3 h, the reaction mixture was poured into a mixture of saturated NaHCO3 (50 ml) and 10% Na2S2O3 (20 ml) at 0 ˚C, extracted with AcOEt, washed with saturated NaHCO3 and saturated NaCl, dried, and concentrated. Purification of the residue by silica gel column chromatography (SiO2 6 g, 1% Et3N-11% AcOEt-hexane (containing) to 1% Et3N-20% AcOEt-hexane) gave **20** (162.3 mg, 81%) as a yellow oil. []23D +53.1 (*c* 1.01, CHCl3); 1H NMR (300 MHz, CDCl3)  7.73 (1H, d, J = 15.0 Hz), 7.08 (1H, d, J =15.0 Hz), 6.87 (1H, ddd, *J* = 3.3, 5.1, 9.6 Hz), 6.02 (1H, dt, *J* = 9.6, 1.2 Hz), 5.90 (1H, d, J = 16.5 Hz), 5.76 (1H, dd, J = 5.7, 16.5 Hz), 4.95 (1H, dt, *J* = 5.7, 9.3 Hz), 4.09 (1H, dd, *J* = 3.6, 6.9 Hz), 2.78 (1H, dd, *J* = 3.6, 16.5 Hz), 2.45 (2H, m), 2.31 (1H, dd, *J* = 6.9, 16.5 Hz), 1.34 (3H, s), 0.89 (18H, t, *J* = 7.5 Hz), 0.54 (6H, q, *J* =7.5 Hz); 13C NMR (75 MHz, CDCl3)  195.7, 164.1, 145.3, 144.6, 137.2, 126.1, 121.6, 98.8, 77.4, 77.3, 75.2, 44.4, 29.8. 25.6, 7.1, 6.9, 6.7, 5.0; IR (neat) 1728, 1690, 1567, 1379, 1242, 1097, 1010 cm-1; MS (FAB, NBA) *m/z* 643 (M+Na+).

(6*R*)-6-[(3*R*,4*R*,1*E*,7*Z*)-4-Hydroxy-8-iodo-3-methyl-6-oxo-3-(triethylsilanyloxy)octa-1,7-dienyl]-5,6-dihydropyran-2-one (22)

A solution of **15** (221 mg, 0.356 mmol) in 47% HF-pyridine-H2O-MeCN (1:4:2:20; 77 ml) was stirred with cooling in an ice bath for 8 h. The reaction mixture was basified with saturated NaHCO3 (50 ml), extracted with AcOEt, dried, and concentrated. Purification of the residue by silica gel column chromatography (SiO2 5 g, 30% AcOEt-hexane containing1% Et3N) gave **17** (146 mg, 81%) as a yellow oil. []24D +39.4 (*c* 1.00, CHCl3); 1H NMR (300 MHz, CDCl3)  7.35 (1H, d, *J* = 8.7 Hz), 7.26 (1H, d, *J* = 8.7 Hz), 6.89 (1H, ddd, *J* = 3.6, 4.8, 9.9 Hz), 6.05 (1H, dt, *J* = 1.5, 9.9 Hz), 5.91 (1H, d, *J* = 15.9 Hz), 5.82 (1H, dd, *J* = 5.0, 15.9 Hz), 4.96 (1H, dt, *J* = 5.4, 9.3 Hz), 3.96 (1H, ddd, *J* = 2.1, 3.1, 9.6 Hz), 2.92 (1H, d, *J* = 3.6 Hz), 2.79 (1H, dd, *J* = 2.1, 17.4 Hz), 2.51 (1H, dd, *J* = 9.6, 17.4 Hz), 2.43-2.48 (2H, m), 1.39 (3H, s), 0.94 (9H, t, *J* = 8.1 Hz), 0.59 (6H, q, *J* = 8.1 Hz)**;** 13C NMR (75 MHz, CDCl3)  199.0, 164.0, 144.6, 137.1, 135.4, 127.3, 121.7, 91.8, 77.4, 76.7, 74.6, 45.7, 29.5, 23.1, 7.2, 6.7; IR (neat) 3471, 1718, 1697, 1568, 1458, 1381, 1244, 1076 cm-1; MS (FAB, NBA) *m/z* 529 (M+Na+).

**(6*R*)-6-[(3*R*,4*R*,1*E*,7*E*)-4-Hydroxy-8-iodo-3-methyl-6-oxo-3-(triethylsilanyloxy)octa-1,7-dienyl]-5,6-dihydropyran-2-one**

[]19D +49.8 (*c* 1.00, CHCl3); 1H NMR (300 MHz, CDCl3)  7.88 (1H, d, *J* = 15.0 Hz), 7.18 (1H, d, *J* = 15.0 Hz), 6.90 (1H, ddd, *J* = 3.9, 5.1, 9.6 Hz), 6.06 (1H, dt, *J* = 1.5, 9.6 Hz), 5.91 (1H, d, *J* = 15.9 Hz), 5.82 (1H, dd, *J* = 5.4, 15.9 Hz), 4.96 (1H, dt, *J* = 5.4, 9.3 Hz), 3.90 (1H, dq, *J* = 2.1, 9.6 Hz), 2.86 (1H, d, *J* = 3.3 Hz), 2.72 (1H, dd, *J* = 2.1, 16.5 Hz), 2.48 (1H, dd, *J* = 9.6, 17.4 Hz), 2.43-2.47 (2H, m), 1.39 (3H, s), 0.94 (9H, t, *J* = 8.1 Hz), 0.59 (6H, q, *J* = 8.1 Hz)**;** 13C NMR (75 MHz, CDCl3)  197.3, 163.9, 144.8, 144.6, 137.1, 127.4, 121.8, 100.3, 77.4, 76.8, 74.6, 41.9, 29.6, 23.1, 7.2, 6.7; IR (neat) 3446, 1718, 1568, 1381, 1244, 1078 cm-1; MS (FAB, NBA) *m/z* 529 (M+Na +).

**(6*R*)-6-[(3*R*,4*R*,6*R*,1*E*,7*Z*)-4,6-Dihydroxy-8-iodo-3-methyl-3-(triethylsilanyloxy)octa-1,7-dienyl]-5,6-dihydropyran-2-one (23)**

A solution of tetramethylammonium triacetoxyborohydride (180.3 mg, 0.685 mmol) and acetic acid (135 l) in MeCN (0.1 ml) was stirred for 30 min. To the resulting mixture was added a solution of **22** (42.5 mg, 0.0840 mmol) in MeCN (1.1 ml) at –40 °C, allowed to warm to –30 °C. After stirring at –30 °C for 1 week, 20% NaO2CCH(OH)CH(OH)CO2K (5 ml) and saturated NaHCO3 (5 ml) were added and the mixture was stirred for 30 min at room temperature, extracted with AcOEt, dried, and concentrated. Purification of the residue by preparative TLC (50% AcOEt-hexane) gave **23** [42.4 mg, 99%, (11*R*:11*S* = 92:8)] as a colorless oil. []25D +58.8 (*c* 1.05, CHCl3); 1H NMR (300 MHz, CDCl3)  6.89 (1H, ddd, *J* = 3.5, 5.3, 9.9 Hz), 6.42 (1H, t, *J* = 7.5 Hz), 6.29-6.32 (1H, m), 6.06 (1H, dt, *J* = 2.1, 9.9 Hz), 5.88 (1H, d, *J* = 15.9 Hz), 5.78 (1H, dd, *J* = 5.1, 15.8 Hz), 4.96 (1H, dt, *J* = 5.1, 9.6 Hz), 4.53-4.66 (1H, brm), 3.67 (1H, dt, *J* = 2.9, 10.5 Hz), 2.90 (1H, brs), 2.79 (1H, s), 2.41-2.47 (2H, m), 1.72 (1H, dd, *J* = 7.8, 13.5 Hz), 1.57 (1H, ddd, *J* = 6.5, 7.8, 10.8 Hz), 1.33 (3H, s), 0.94 (9H, t, *J* = 7.8 Hz), 0.59 (6H, q, *J* = 7.8 Hz); 13C NMR (75 MHz, CDCl3)  163.8, 144.5, 143.5, 137.8, 127.6, 121.8, 81.4, 77.4, 77.3, 75.2, 72.7, 35.4, 29.6, 20.8, 7.1, 6.7; IR (neat) 3437, 1714, 1382, 1243, 1056 cm-1; MS (FAB, NBA) *m/z* 531 (M+Na+).

**(6*R*)-6-[(3*R*,4*R*,6*S*,1*E*,7*Z*)-4,6-Dihydroxy-8-iodo-3-methyl-3-(triethylsilanyloxy)octa-1,7-dienyl]-5,6-dihydropyran-2-one (24)**

To a solution of **** (32 mg, 0.0632 mmol) in THF (0.25 ml) was added triethylborane (0.11 M in MeOH-THF (4:1), 0.7 ml, 0.077 mmol) and NaBH4 (3.0 mg, 0.0793 mmol) at –78 °C, After stirring at –78 °C for 14 h, 30% H2O2 (0.32 ml) was added and then MeOH (1 ml), AcOEt (1 ml), and saturated NaHCO3 (1 ml) were added at room temperature. After being stirred for 10 min, the reaction mixture was extracted with AcOEt, dried with MgSO4, and concentrated. Purification of the residue by preparative TLC (50% hextane-AcOEt) gave **24** (29.0 mg, 90%) as a colorless oil. []27D –88.0 (*c* 0.30, CHCl3); 1H NMR (300 MHz, CDCl3)  6.89 (1H, ddd, *J* = 3.6, 5.1, 9.9 Hz), 6.30 (2H, m), 6.07 (1H, td, *J* = 2.0, 10.0 Hz), 5.90 (1H, d, *J* = 16.8 Hz), 5.81 (1H, dd, *J* = 5.4, 16.8 Hz), 4.97 (1H, td, *J* = 5.4, 9.9 Hz), 4.56 (1H, Brd, *J* = 9.3 Hz), 3.69 (1H, td, *J* = 2.1, 10.8 Hz), 3.53 (1H, d, *J* = 1.2 Hz), 3.03 (1H, brdd, *J* = 1.2, 2.4 Hz), 2.46 (2H, m), 1.68 (1H, brd, *J* = 14.1 Hz), 1.40-1.55 (1H, m), 1.33 (3H, s), 0.95 (9H, t, *J* = 8.1 Hz), 0.61 (6H, q, *J* = 8.1 Hz); 13C NMR (75 MHz, CDCl3)  163.8, 144.4, 143.4, 137.4, 127.9, 81.7, 77.4, 76.9, 75.5, 35.8, 29.7, 20.8, 7.2, 6.7; IR (neat) 3435, 1712, 1382, 1247, 1084 cm-1; MS (FAB, NBA) *m/z* 531 (M+Na+).

**(6*R*)-6-[(3*R*,4*R*,6*R*,1*E*,7*E*)-4,6-Dihydroxy-8-iodo-3-methyl-3-(triethylsilanyloxy)octa-1,7-dienyl]-5,6-dihydropyran-2-one (25)**

Compound **25**, a colorless oil, was obtained from the corresponding -hydroxy ketone with perfect diastereoselectivity in 98% yield in the same manner described for the preparation of **23** from **22**. []27D +28.8 (*c* 0.68, CHCl3); 1H NMR (300 MHz, CDCl3)  6.90 (1H, ddd, *J* = 3.5, 5.1, 9.6 Hz), 6.57 (1H, dd, *J* = 3.6, 5.1, 9.6 Hz), 6.40 (1H, dd, *J* = 1.2, 14.1 Hz), 6.07 (1H, dt, *J* = 1.8, 11.1 Hz), 5.86 (1H, d, *J* = 15.9 Hz), 5.78 (1H, dd, *J* = 5.1, 15.9 Hz), 4.95 (1H, dt, *J* = 5.1, 9.6 Hz), 4.40 (1H, quint., *J* = 6.0 Hz), 3.65 (1H, m), 2.88 (1H, d, *J* = 6.6 Hz), 2.73 (1H, *J* = 2.4 Hz), 2.44 (2H, m), 1.31 (3H, s), 0.95 (9H, t, *J* = 7.8 Hz), 0.59 (6H, q, *J* = 7.8 Hz); 13C NMR (75 MHz, CDCl3)  163.8, 148.1, 144.5, 143.5, 137.8, 127.9, 121.8, 77.3, 75.1, 77.3, 72.3, 36.0, 29.6, 20.5, 7.1, 6.7; IR (neat) 3423, 1712, 1245 cm-1; MS (FAB, NBA) *m/z* 531 (M+Na+).

**(6*R*)-6-[(3*R*,4*R*,6*S*,1*E*,7*E*)-4,6-Dihydroxy-8-iodo-3-methyl-3-(triethylsilanyloxy)octa-1,7-dienyl]-5,6-dihydropyran-2-one (26)**

Compound **26**, a colorless oil, was obtained from the corresponding -hydroxy ketone with perfect diastereoselectivity in 99% yield in the same manner described for the preparation of **24** from **22**. []26D +75.6 (*c* 0.36, CHCl3); 1H NMR (300 MHz, CDCl3)  6.90 (1H, ddd, *J* = 3.3, 5.1, 9.6 Hz), 6.53 (1H, dd, J = 5.4, 14.1 Hz), 6.40 (1H, dd, J = 1.2, 14.1 Hz), 6.07 (1H, ddd, *J* = 1.2, 2.4, 9.9 Hz), 5.86 (1H, d, *J* = 15.9 Hz), 5.57 (1H, dd, *J* = 5.1, 15.9 Hz), 4.96 (1H, dt, *J* = 5.1, 9.6 Hz), 4.56 (1H, brs), 3.71 (1H, s), 3.59 (1H, d, *J* = 11.1 Hz), 3.01 (1H, brs), 2.45 (2H, m), 1.62 (1H, brs), 1.25-1.47 (1H, m), 1.31 (3H, s), 0.94 (9H, t, *J* = 7.5 Hz), 0.59 (6H, q, *J* = 7.5 Hz); 13C NMR (75 MHz, CDCl3)  163.7, 147.6, 144.4, 137.4, 128.1, 121.8, 78.7, 77.4, 77.2, 74.7, 37.0, 29.6, 20.48, 7.1, 6.7; IR (neat) 3438, 1711, 1250 cm-1; MS (FAB, NBA) *m/z* 531 (M+Na+).

**(6*R*)-6-[(3*R*,4*R*,6*R*,1*E*,7*Z*)-6-(*tert*-Butyldimetylsilanyloxy)-4-hydroxy-8-iodo-3-methyl-3-(triethylsilanyloxy)octa-1,7-dienyl]-5,6-dihydropyran-2-one (27)**

To a solution of **23** (37.6 mg, 0.0740 mmol, 84% de) and 2,6-lutidine (12 l, 0.103 mmol) in CH2Cl2 (0.7 ml) was added TBSOTf (20 l, 0.0871 mmol) at –78 °C. After stirring at –78 °C for 10 min, the reaction was quenched with saturated NaHCO3 (5 ml). The reaction mixture was extracted with CH2Cl2, dried with MgSO4, and concentrated. Purification of the residue by preparative TLC (1% AcOEt-benzene) gave **27** (37.1 mg, 81%) and its (6*S*)-isomer (3.0 mg, 7%) each as a yellow oil. **27**: []24D +35.9 (*c* 1.13, CHCl3); 1H NMR (300 MHz, CDCl3)  6.89 (1H, dt, *J* = 9.9, 4.2 Hz), 6.33 (1H, t, *J* = 7.5 Hz), 6.21 (1H, dd, *J* = 1.2, 7.5 Hz), 6.05 (1H, dt, *J* = 1.5, 9.9 Hz), 5.90 (1H, dd, *J* = 0.9, 15.9 Hz), 5.79 (1H, dd, *J* = 5.7, 15.9 Hz), 4.95 (1H, ddt, *J* = 0.9, 9.0, 5.7 Hz), 4.65 (1H, dt, *J* = 1.2, 6.6 Hz), 3.62 (1H, ddd, *J* = 1.5, 2.7, 10.8 Hz), 3.03 (1H, d, *J* = 2.7 Hz), 2.46-2.43 (2H, m), 1.70 (1H, ddd, *J* = 1.5, 7.5, 14.1 Hz), 1.38 (1H, ddd, *J* = 3.3, 10.8, 14.1 Hz), 1.33 (3H, s), 0.93 (9H, t, *J* = 8.1 Hz), 0.87 (9H, s), 0.57 (6H, q, *J* = 8.1 Hz), 0.10 (3H, s), 0.05 (3H, s); 13C NMR (75 MHz, CDCl3)  164.0, 144.6, 144.1, 137.9, 126.8, 121.8, 84.9, 80.0, 77.7, 74.9, 74.2, 37.0, 29.7, 25.8, 22.5, 18.1, 7.2, 6.8, -4.3, -5.0; IR (neat) 3500, 1726, 1462, 1382, 1249, 1081 cm-1; MS (FAB, NBA) *m/z* 645 (M+Na+).

**(6*S*)-isomer**: []25D –8.0 (c 0.25, CHCl3), []26D 0.80 (c 0.25, EtOH); 1H NMR (300 MHz, CDCl3)  6.89 (1H, dt, *J* = 9.9, 3.9 Hz), 6.24 (1H, d, *J* = 7.8 Hz), 6.19 (1H, t, *J* = 7.8 Hz), 6.05 (1H, dt, *J* = 1.8, 9.9 Hz), 5.91 (1H, dd, *J* = 16.2 Hz), 5.80 (1H, dd, *J* = 6.0, 16.2 Hz), 4.95 (1H, brq, *J* = 6.9 Hz), 4.58 (1H, dt, *J* = 4.8, 7.8 Hz), 3.55 (1H, brd, *J* = 10.2 Hz), 3.17 (1H, d, *J* = 1.5 Hz), 2.45 (2H, m), 1.80 (1H, dd, *J* = 5.4, 14.4 Hz), 1.38 (3H, s), 1.25-1.43 (1H, m), 0.96 (9H, t, *J* = 7.8 Hz), 0.89 (9H, s), 0.61 (6H, q, *J* = 7.8 Hz), 0.14 (3H, s), 0.08 (3H, s); 13C NMR (75 MHz, CDCl3)  164.2, 144.6, 144.0, 137.7, 126.4, 121.8, 80.5, 77.7, 77.3, 73.2, 37.4, 29.8, 25.9, 23.7, 18.0, 7.3, 6.9, -4.0, -4.7; IR (neat) 3523, 1726, 1248, 1078 cm-1; MS (FAB, NBA) *m/z* 645 (M+Na+).

**(6*R*)-6-[(3*R*,4*R*,6*R*,1*E*,7*Z*,9*Z*,11*E*)-6-(*tert*-Butyldimethylsilanyloxy)-13-(*tert*-butyldiphenylsilanyloxy)-4-hydroxy-3-methyl-3-(triethylsilanyloxy)-trideca-1,7,9,11-tetraenyl]-5,6-dihydro-pyran-2-one (29)**

To an-ice-cooled solution of **27** (37.1 mg, 0.0596 mmol) and stannane **28** (135.4 mg, 0.238 mmol) in DMF (0.3 ml) was added Pd(MeCN)2Cl2 (0.8 mg, 0.00308 mmol). After stirring at 0 °C for 24 h, NaHCO3 (5 ml) was added and the reaction mixture was extracted with Et2O, dried, and concentrated. Purification of the residue by preparative TLC (10% AcOEt-benzene) gave **29** (42.6 mg, 88%) as a pale yellow oil. []24D –0.38 (*c* 1.04, CDCl3) ; 1H NMR (300 MHz, CDCl3)  7.71 (4H, dd, *J* = 2.1, 8.1 Hz), 7.38-7.41 (6H, m), 6.88 (1H, dt, *J* = 4.5, 9.6 Hz), 6.77 (1H, dd, *J* = 11.7, 14.7 Hz), 6.34 (1H, d, *J* = 11.1 Hz), 6.15 (1H, d, *J* = 11.1 Hz), 6.06 (1H, dt, *J* = 1.5, 9.6 Hz), 5.94 (1H, dd, *J* = 10.2, 15.9 Hz) 5.89 (1H, d, *J* = 15.9 Hz), 5.79 (1H, dd, *J* = 5.7, 15.9 Hz), 5.76-5.84 (1H, m), 5.53 (1H, dd, *J* = 9.9, 10.8 Hz), 4.96 (1H, dt, *J* = 6.0, 8.4 Hz), 4.29 (1H, d, *J* = 3.9 Hz), 3.69 (1H, d, *J* = 10.8 Hz), 3.04 (1H, d, *J* = 2.1 Hz), 2.43-2.47 (2H, m), 1.64 (1H, dt, *J* = 6.9, 14.1 Hz), 1.32 (3H, s), 1.26-1.37 (1H, m), 1.07 (9H, s), 0.92 (9H, t, *J* = 8.1 Hz), 0.88 (9H, s), 0.57 (6H, q, *J* = 8.1 Hz), 0.07 (3H, s), 0.04 (3H, s); 13C NMR (75 MHz, CDCl3) 164.0, 144.5, 138.0, 135.6, 134.4, 133.6, 130.1, 127.8, 126.8, 124.5, 123.2, 122.3, 121.8, 77.6, 77.2, 75.0, 67.1, 64.2, 39.9, 29.7, 26.9, 25.9, 22.3 19.3, 18.1, 7.1, 6.8, -4.3, -5.0; IR (neat) 3484, 2949, 1726, 1379, 1248, 1072 cm-1; MS (FAB, NBA) *m/z* 839 (M+Na+).

**Diallyl (1*R,*3*R*,4*Z*,6*Z*,8*E*)-3-(*tert*-Butyldimethylsilanyloxy)-10-(*tert*-butyldiphenylsilanyl**

**oxy)-1-{(1*R*)-1-methyl-3-[(2*R*)-6-oxo-3,6-dihydro-2*H*-pyran-2-yl]-1-(triethylsilanyloxy)allyl}-deca-4,6,8-trienyl Phosphate (30)**

To an ice-cooled solution of **29** (42.8 mg, 0.0524 mmol) and tetrazole (58.2 mg, 0.830 mmol) in CH2Cl2 (0.8 ml) was added diallyl *N,N*-diisopropylphosphoramidate (104.9 mg, 0.428 mmol). After stirring for 1.5 h at 0 °C, *tert*-butyl hydroperoxide (3.04 M in CH2Cl2; 140 l, 0.426 mmol) was added. After stirring at 0 °C for 1.5 hr, the reaction was quenched with 10% Na2S2O3 (1 ml). The reaction mixture was stirred at room temperature for 30 min, diluted with saturated NaHCO3 (5 ml), extracted with CH2Cl2, dried, and concentrated. Purification of the residue by preparative TLC (66% AcOEt-hexane) gave **30** (45.4 mg, 89%) as a pale yellow oil. []24D +18.8 (*c* 1.00, CHCl3); 1H NMR (300 MHz, CDCl3)  7.68 (4H, d, *J* = 7.8 Hz), 7.39 (6H, q, *J* = 7.3 Hz), 6.87 (1H, dq, *J* = 4.5, 9.3 Hz), 6.75 (1H, dd, *J* = 10.8, 14.7 Hz), 6.31 (1H, t, *J* = 10.2 Hz), 6.23 (1H, d, *J* = 10.2 Hz), 6.04 (1H, dd, *J* = 2.2, 9.9 Hz), 5.87 (1H, d, *J* = 15.6 Hz), 5.78-5.98 (2H, m), 5.79 (1H, dd, *J* = 5.1, 15.6 Hz), 5.41 (1H, dd, *J* = 1.5, 3.6 Hz), 5.35 (2H, dd, *J* = 1.5, 3.6 Hz), 5.26 (1H, ddd, *J* = 1.5, 4.5, 10.8 Hz), 4.91-4.98 (1H, m), 4.94 (1H, dt, *J* = 5.7, 9.3 Hz), 4.52-4.58 (4H, m), 4.44 (1H, t, *J* = 8.2 Hz), 4.28 (2H, d, *J* = 4.5 Hz), 2.42-2.48 (2H, m), 1.96 (1H, t, *J* = 14.4 Hz), 1.43 (3H, s), 1.19-1.33 (1H, m), 1.07 (9H, s), 0.95 (9H, t, *J* = 7.8 Hz), 0.88 (9H, s), 0.61 (6H, q, *J* = 7.8 Hz), 0.11 (3H, s), 0.03 (3H, s); 13C NMR (75 MHz, CDCl3)  164.1, 144.7, 136.8, 136.3, 135.6, 134.2, 133.6, 132.7 (*J*C-P = 5.9 Hz), 129.9, 129.8, 127.8, 127.0, 124.6, 123.7, 122.4, 123.4, 122.4, 121.7, 118.4, 118.2, 82.6 (*J*C-P = 6.8 MHz), 77.6, 77.3, 76.1 (*J*C-P = 4.5 MHz), 68.16 (*J*C-P = 2.5 MHz), 68.23 (*J*C-P = 2.6 MHz), 65.1, 64.6, 40.4, 29.7, 26.9, 26.4, 26.0, 24.9, 19.3, 18.17.2, 6.8, -3.9, -4.4; IR (neat) 1729, 1504, 1248, 1016 cm-1; MS (FAB, NBA) *m/z* 999 (M+Na+).

#### **Fostriecin (1)**

To a degassed solution of **30** (13.7 mg, 0.0140 mmol), HCONH2 (2.8 mg, 0.0444 mmol) and PPh3 (1.1 mg, 0.00419 mmol) in THF (1 ml) was added Pd(PPh3)4 (1.6 mg, 0.00138 mmol). After stirring at room temperature for 4 h, MeOH (0.5 ml) and DOWEX® 50WX8-200 ion-exchange resin (pre-washed with THF and MeOH; 85.4 mg) were added. After being stirred at room temperature for 20 min, the reaction mixture was filtered through Celite and concentrated. Crude **31** was dissolved into pyridine (25 l) and 47% HF-H2O-MeCN (1:2:20; 0.5 ml) was added with cooling in an ice-bath. After being stirred at room temperature for 2 hr, NaHCO3 (0.5 ml) was added with cooling in an ice-bath. The reaction mixture was washed with Et2O (1 ml x 3) and the aqueous layer was concentrated by lyophilization. Purification of the residue by reversed phase column chromatography [Cosmosil 140C18-PREP (purchased from Nacalai Tesque Co. Inc.) 0.5 g, 100% H2O to 10% MeCN-H2O] gave fostriecin (**1**) (5.0 mg, 0.0111 mmol, 79%) as a white powder. []26D +27.6 (*c* 0.50, 0.1 M sodium phosphate buffer) ; 1H NMR (500 MHz, D2O)  7.10 (1H, ddd, *J* = 3.0, 5.5, 10.0 Hz), 6.76 (1H, ddd, *J* = 0.5, 11.0, 15.0 Hz), 6.56 (1H, t, *J* = 11.5 Hz), 6.35 (1H, t, *J* = 11.5 Hz), 6.15 (1H, t, *J* = 11.0 Hz), 6.01 (1H, ddd, *J* = 1.5, 2.5, 10.0 Hz), 5.90-5.96 (3H, m), 5.54 (1H, t, *J* = 9.5 Hz), 5.10 (1H, m), 4.92 (1H, t, *J* = 10.0 Hz), 4.16 (2H, d, *J* = 6.0 Hz), 4.14 (1H, dt, *J* = 2.0, 10.0 Hz), 2.60 (1H, dddd, *J* = 1.0, 4.5, 5.5, 18.5 Hz), 2.51 (1H, ddt, *J* = 10.5, 18.5, 3.0 Hz), 1.68 (1H, t, *J* = 13.0 Hz), 1.54 (1H, ddd, *J* = 2.5, 11.0, 14.0 Hz), 1.29 (3H, s) ; 13C NMR (125 MHz, D2O) 170.8, 152.0, 140.6, 136.8, 136.3, 133.4, 129.8, 129.1, 127.1, 127.0, 122.3, 81.8, 79.9, 78.2, 66.6, 65.0, 41.7, 31.9, 24.1; UV (MeOH) max 268 nm with inflections at 259 and 278 nm;HRMS (FAB, NBA) *m/z* 453 (M+Na)+, 476 (M+2Na)+. These spectral data were identical with those of natural fostriecin, []26D +28.3 (*c* 0.60, 0.1 M sodium phosphate buffer) {lit.2 []26D +33 (*c* 1.0, 0.1 M sodium phosphate buffer)},which was obtained by purification of the sample supplied by Dr. Schultz by the exactly same procedure as described for the synthetic fostriecin.

**Ethyl (1*E*,3*Z*)-5-(Tributylstannanyl)penta-2,4-dienoate**

To a solution of (COCl)2 (1.2 ml, 13.8 mmol) in CH2Cl2 (30 ml) was added DMSO (2.0 ml, 28.2 mmol) at –78 °C. After stirring at –78 °C for 10 min, a solution of (*Z*)-3-(tributylstannanyl)prop-2-en-1-ol (3.30 g, 9.51 mmol)3 in CH2Cl2 (30 ml) was added and the mixture was stirred at –78 °C for 20 min. The reaction mixture was treated with Et3N (5.3 ml, 38.0 mmol), allowed to warm to room temperature, and stirred for 30 min. The resulting mixture was cooled to –78 °C and (carbetoxymethylene)triphenylphosphorane (4.89 g, 14.3 mmol) was added. The reaction mixture was allowed to warm to room temperature, stirred for 30 min, extracted with hexane. The extract was washed with water and saturated NaCl, dried, and concentrated. Purification of the residue by silica gel column chromatography (SiO2 150 g, 1% Et3N-hexane to 2% Et3N-hexane) gave ethyl (2*E*,4*Z*)-5-(tributylstannanyl)penta-2,4-dienoate [3.58 g, 98%, (2*E*,4Z : 2*E*,4*E* = 92 : 8)] as a pale yellow oil. 1H NMR (300 MHz, CDCl3)  7.35 (0.08H, t, *J* = 12.0 Hz), 7.21 (0.92H, t, *J* = 11.1 Hz), 7.14 (0.92H, t, *J* = 11.1 Hz), 6.95 (0.08H, td, *J* = 2.7, 11.7 Hz), 6.71 (0.92H, dt, *J* = 11.7, 28.8 Hz), 6.43 (0.08H, t, *J* = 11.4 Hz), 5.88 (0.92H, td, *J* = 12.3, 14.4 Hz), 5.73 (0.08H, t, *J* = 11.4 Hz), 4.21 (2H, q, *J* = 7.2 Hz), 1.51 (6H, q, *J* = 7.8 Hz), 1.32 (6H, q, *J* = 7.8 Hz), 1.28 (6H, t, *J* = 7.2 Hz), 1.01 (3H, t, *J* = 8.1 Hz), 1.32 (9H, ddd, *J* = 5.4, 7.2, 20.1 Hz); 13C NMR (75 MHz, CDCl3)  167.0, 147.9, 146.7, 144.0, 122.7, 60.3, 29.1 (*J*119Sn-C~*J*117Sn-C= 20.5 Hz), 27.3 (*J*119Sn-C~*J*117Sn-C = 55.8 Hz), 14.4, 13.7, 10.7 (*J*119Sn-C = 343.8 Hz, *J*117Sn-C = 327.8 Hz); IR (neat) 1716, 1628, 1261, 1155, 1043 cm-1; HRMS (EI) calcd for C19H36O2120Sn (M+): 416.1737, found: 416.1767.

**(2*E*,4*Z*)-5-Tributylstannanylpenta-2,4-dien-1-ol**

To a solution of ethyl (2*E*,4*Z*)-5-(tributylstannanyl)penta-2,4-dienoate [3.85 g, 9.30 mmol, (2*E*,4Z : 2*E*,4*E* = 92 : 8)] in CH2Cl2 (30 ml) was added *i*-Bu2AlH (1M in hexane, 30 ml, 30 mmol) at –78 °C. After stirring at –78 °C for 1.5 h, 20% potassium sodium tartrate (50 ml) was added and the mixture was allowed to warm to room temperature over 1 h. The reaction mixture was diluted with 20% potassium sodium tartrate (200 ml), extracted with Et2O, dried, and concentrated. Purification of the residue by silica gel column chromatography (SiO2 150 g, 1% Et3N-hexane to 3% Et3N-hexane) gave (2*E*,4*Z*)-5-tributylstannanylpenta-2,4-dien-1-ol [3.28 g, 95%, (2*E*,4Z : 2*E*,4*E* = 100 : 0)] as a yellow oil. 1H NMR (300 MHz, CDCl3)  7.07 (1H, dd, *J* = 10.2, 12.6 Hz, *J*119Sn-H~*J*117Sn-H = 151.8 Hz), 6.17 (1H, ddd, *J* = 0.9, 10.5, 14.7 Hz), 6.14 (1H, d, *J* = 12.6 Hz, *J*119Sn-H~*J*117Sn-H = 45.3 Hz), 5.86 (1H, dt, J = 15.3, 5.7 Hz), 4.22 (2H, brd, J = 5.7 Hz), 1.51 (6H, m), 1.32 (6H, tt, J = 7.2, 7.8 Hz), 0.95 (6H, m), 0.89 (9H, t, J = 7.2 Hz); 13C NMR (75 MHz, CDCl3)  145.6, 135.4, 134.4, 133.6, 63.6, 29.2, 27.3, 13.8, 10.5; IR (neat) 3300, 1558, 1456, 1371, 1294, 1061 cm-1; HRMS (EI) calcd for C17H34O120Sn (M+): 374.1632, found: 374.1627.

**(1*Z*,3*E*)-5-*tert*-Butyldiphenylsilanyloxy-1-*tri*-*n*-butylstannanylpenta-1,3-diene (28)**

To an ice-cooled solution of (2*E*,4*Z*)-5-tributylstannanylpenta-2,4-dien-1-ol (2.08 g, 5.59 mmol), Et3N (1.2 ml, 8.61 mmol) and 4-dimethylaminopyridine (35.2 mg, 0.288 mmol) in CH2Cl2 (20 ml) was added *tert*-butyldiphenylsilyl chloride (1.7 ml, 6.53 mmol). After being stirred at 0 °C for 2.5 h, the mixture was diluted with water, extracted with hexane, washed with water and saturated NaCl, dried, concentrated. Purification of the residue by silica gel column chromatography (SiO2 30 g, 1% Et3N-hexane) gave **28** (3.18 g, 100%) as a colorless oil.1H NMR (300 MHz, CDCl3)  7.69 (4H, dd, *J* = 2.0, 87.7 Hz), 7.35-7.46 (6H, m), 7.09 (1H, dd, *J* = 10.8, 12.6 Hz), 6.29-6.38 (1H, m), 6.06 (1H, dt, *J* = 12.9 Hz, *J*119Sn-H~*J*117Sn-H = 63.9 H), 5.80 (1H, dd, *J* = 4.5, 15.0 Hz), 4.27 (2H, dd, *J* = 1.7, 4.5 Hz), 1.45-1.55 (6H, m), 1.29 (6H, dq, *J* = 7.2, 14.4 Hz), 1.08 (9H, s), 0.95 (6H, dd, *J* = 7.8, 8.4 Hz), 0.87 (9H, t, *J* = 7.5 Hz); 13C NMR (75 MHz, CDCl3)  146.3, 135.6, 134.3, 133.6, 133.2, 131.7 (*J*119Sn-C~*J*117Sn-C = 43.3 Hz), 129.7, 127.8, 63.9, 29.3 (*J*119Sn-C~*J*117Sn-C = 20.5 Hz), 27.4 (*J*119Sn-C~*J*117Sn-C = 54.6 Hz), 27.0, 19.3, 13.8, 10.5 (*J*119Sn-C = 339.2 Hz, *J*117Sn-C = 324.5 Hz); IR (neat) 1560, 1460, 1377, 1115, 1072 cm-1; HRMS (EI) calcd for C29H43OSi120Sn (M-Bu+): 555.3191, found: 555.2134. These spectra data were identical with those reported.4

**References**

1. Fargeas, V.; Ménez, P. L.; Berque, I.; Aldisson, J.; Panctazi, A. *Tetrahedoron* **1996**, *52*, 6613-6634.
2. Boger, D. L.; Ichikawa, S.; Zhong, W. *J. Am. Chem. Soc*. **2001**, *123*, 4161-4167.
3. Corey, E. J.; Eckrich, T. M. *Tetrahedron Lett*. **1984**, *25*, 2419-2422.
4. Mapp, A. K.; Heathcock, C. H. *J. Org. Chem*. **1999**, *64*, 23-27.
